# Supplementary material for: Recalibration of the ACC/AHA Risk Score in Two Population-Based German Cohorts
Source: PLOS journal article supplement (doi:10.1371/journal.pone.0164688), 2016-10-12
Supplement: S1 (10.1371/journal.pone.0164688.s001) [file journal.pone.0164688.s001.PDF › journal.pone.0164688.s001.PDF]

# Drop-out analysis

## Methods

In KORA, 486 subjects were lost-to-follow-up without information on incident ASCVD. To rule out possible bias in analysing the ACC/AHA risk score, we performed a sensitivity analysis, analysing the risk profile of these subjects and imputing their missing event status. For this, we used a stratified bootstrapping resampling technique (number of bootstrap samples:  $b = 300$ ) and three imputation scenarios, randomly assigning events with event rate 50%, 20% or 10%. Since we did not have information on survival or censoring time for these subjects, we used the area under the receiver operating characteristic curve (AUC) as a measure of discrimination performance in this sensitivity analysis, as it does not incorporate survival times.<sup>1</sup> We then investigated the impact of the three event rate scenarios on the performance of the ACC/AHA risk score.

## Results

Exclusion of subjects with missing information on risk score variables resulted in 5,238 completely observed subjects and 464 (8%) subjects with missing outcome information. Out of seven risk factors included in the ACC/AHA risk equation, we observed significant differences regarding five risk factors (age, total cholesterol, systolic blood pressure, smoking and diabetes) between KORA subjects without follow-up on incident ASCVD events and KORA subjects included in the main analysis. Using the ACC/AHA risk equations, mean estimated 10 year ASCVD risk was greater for KORA subjects without follow-up (11.5%) than for KORA subjects with follow-up (10.0%). Details are depicted in S2 Table.

Results from imputing missing outcome information with event rate 10%, which was closest to the ASCVD risk estimated by the ACC/AHA risk score, showed a calibration performance comparable to the analysis of the completely observed data, however, poorer performance

regarding discriminative power (Complete data: AUC = 0.78 [0.76, 0.81], imputation with 10% event rate: AUC = 0.76 [0.73, 0.78]). Imputation with event rate 20% and 50% improved calibration of the ACC/AHA risk score in KORA, however, with considerably reduced discrimination ability (event rate 20%: AUC = 0.74 [0.72, 0.76]; event rate 50%: AUC = 0.70 [0.68, 0.72]). Results are depicted in S3 Fig.

<sup>1</sup> Hanley JA, McNeil BJ. The meaning and use of the area under a receiver operating characteristic (ROC) curve. *Radiology*. 1982;143(1):29-36.

**S2 Table. Risk profile of KORA subjects with and without follow-up on incident ASCVD events.**

| Characteristic <sup>a</sup>                                        | KORA                 |                      | p-value <sup>b</sup> |
|--------------------------------------------------------------------|----------------------|----------------------|----------------------|
|                                                                    | With follow-up       | Without follow-up    |                      |
| N <sup>c</sup> (%)                                                 | 5238                 | 464 <sup>d</sup>     |                      |
| Age <sup>e</sup> (years)                                           | 55.9 +- 9.7          | 57.6 +- 10.2         | <0.001               |
| Sex male                                                           | 49.2 (2623)          | 44.4 (216)           | 0.051                |
| Total cholesterol (mg/dL)                                          | 234.2 (207.9, 263.7) | 240.4 (212.8, 270.4) | 0.016                |
| HDL <sup>f</sup> cholesterol (mg/dL)                               | 53.3 (43.8, 65.9)    | 53.0 (44, 64.3)      | 0.617                |
| Systolic blood pressure (mmHg)                                     | 132.0 (120.5, 146.5) | 135.5 (123.5, 148)   | <0.01                |
| Intake of antihypertensive drugs                                   | 20.4 (1085)          | 23.2 (112)           | 0.159                |
| Intake of statins or fibrates                                      | 5.1 (270)            | 6.8 (33)             | 0.118                |
| Current smoker                                                     | 21.1 (1122)          | 25.1 (122)           | 0.043                |
| Diabetes                                                           | 4.8 (257)            | 7.2 (35)             | 0.028                |
| Average 10 year ASCVD risk (%) according to the ACC/AHA risk score | 10.0 ± 10.2          | 11.5 ± 10.5          | <0.001               |

<sup>a</sup>Depicted are absolute numbers (percentage) for categorical and median (first quartile, third quartile) for continuous variables.

<sup>b</sup>p-value from Kruskal-Wallis test for continuous and Chi-square-test for categorical variables.

<sup>c</sup>N = Sample size.

<sup>d</sup>Of n=486 subjects without follow-up, 22 subjects had to be excluded due to missing information in one or more risk factors.

<sup>e</sup>Age (years) is shown as mean ± standard deviation.

<sup>f</sup>HDL = High-density lipoprotein.

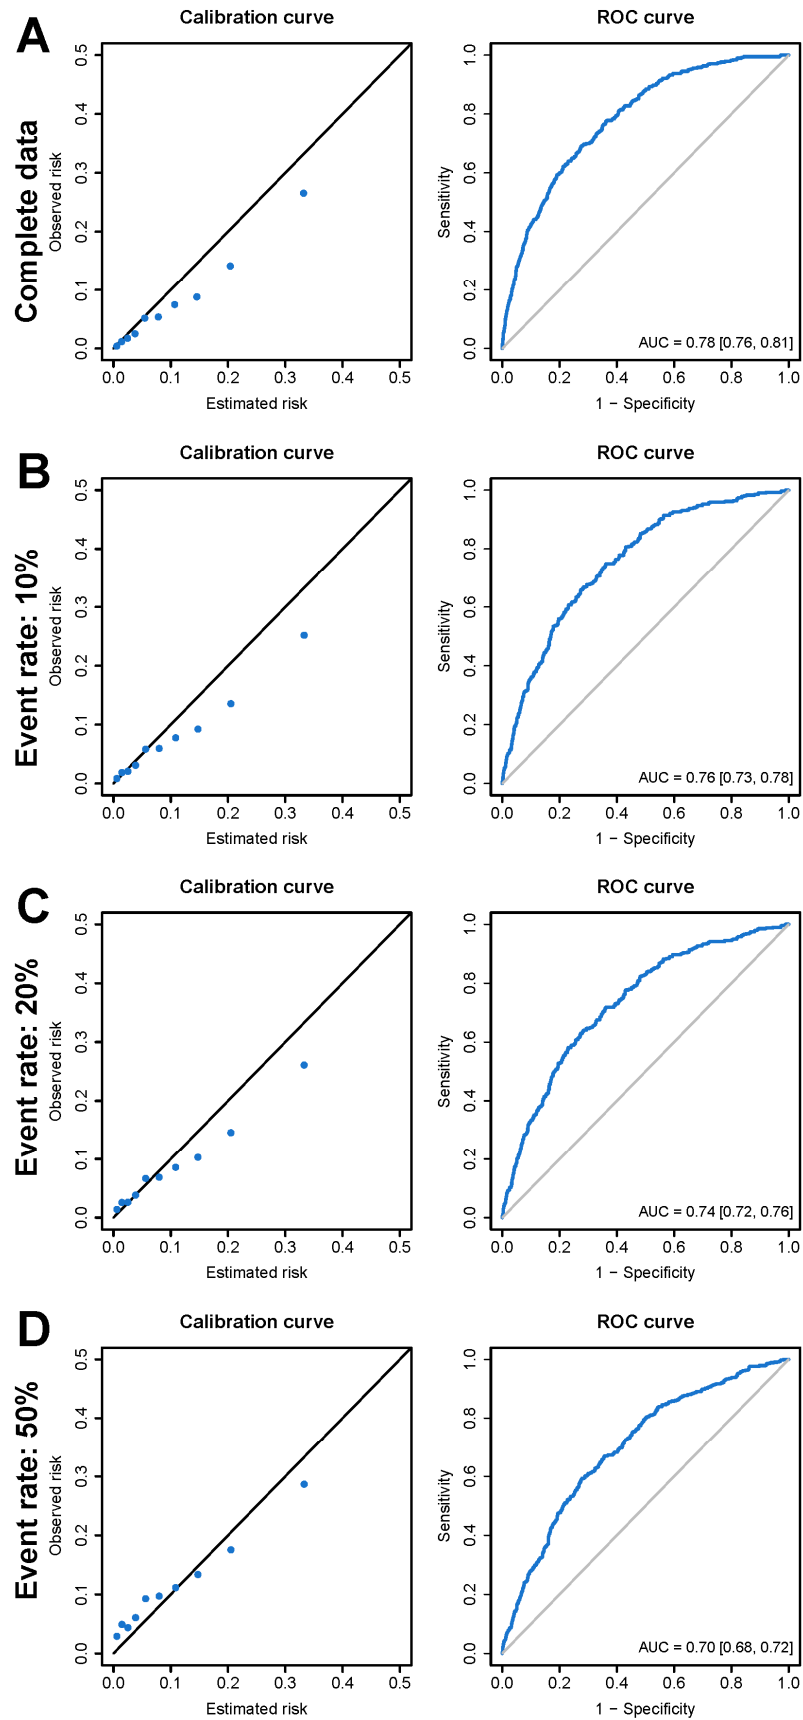

**S3 Fig. Calibration and ROC curve from drop-out analysis.** ROC analysis and calibration performance of ACC/AHA risk score after imputation of lost-to-follow-up subjects in KORA: Complete case analysis without imputation (part A), random assignment of event status to lost-to-follow-up subjects with event-rate 10% (part B), 20% (part C) and 50% (part D).
