# Supplementary material for: Recalibration of the ACC/AHA Risk Score in Two Population-Based German Cohorts
Source: PLOS journal article supplement (doi:10.1371/journal.pone.0164688), 2016-10-12

## KORA S3 & S4

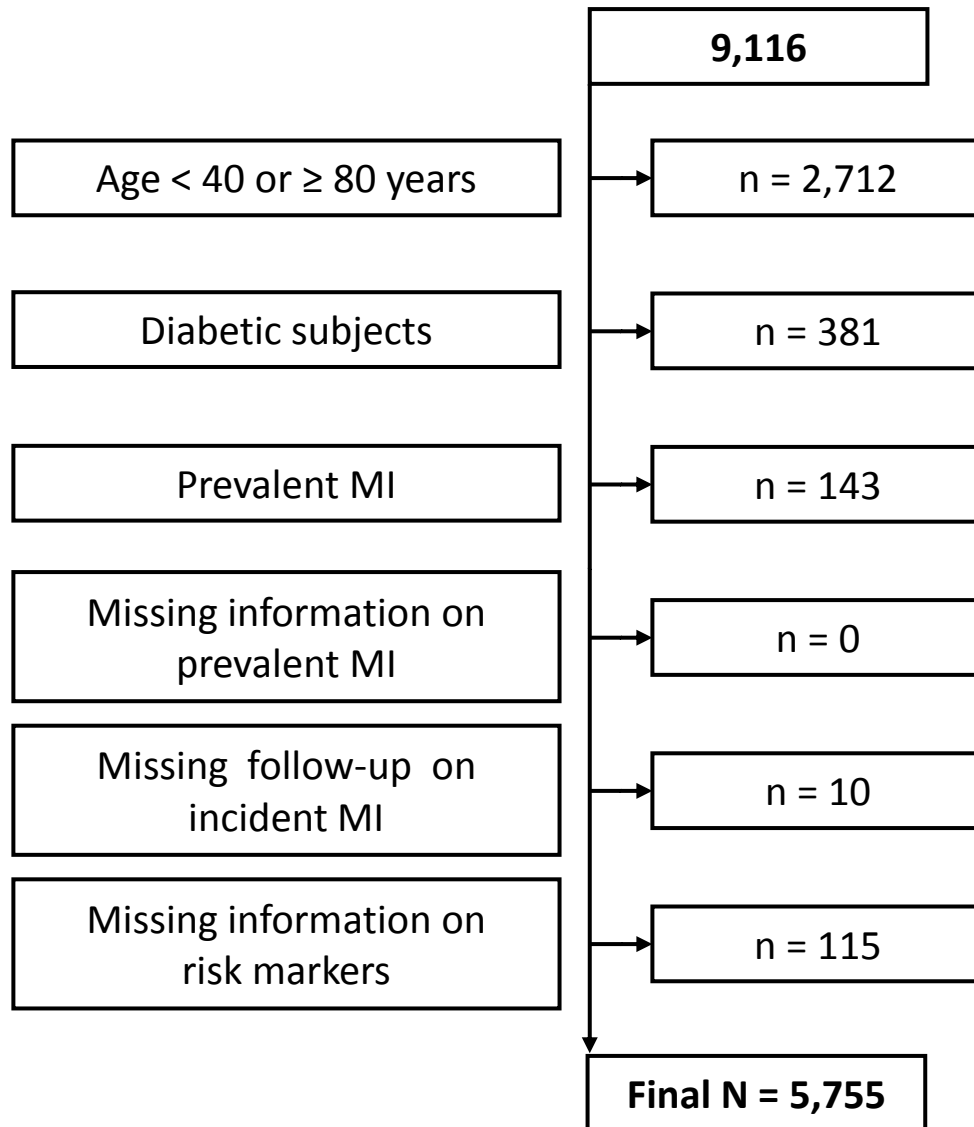

## Heinz Nixdorf Recall

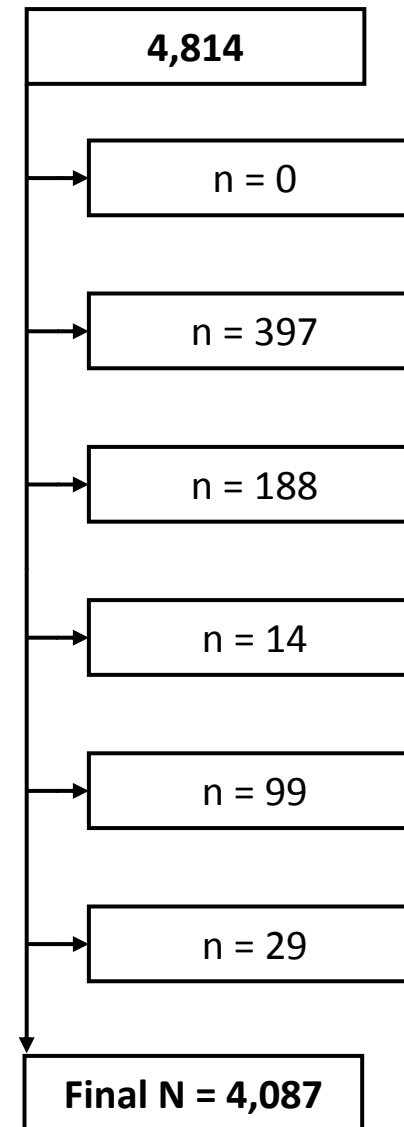

Supplement: S2 (10.1371/journal.pone.0164688.s002) [file journal.pone.0164688.s002.PDF › journal.pone.0164688.s002.PDF]
