# Supplementary material for: Recalibration of the ACC/AHA Risk Score in Two Population-Based German Cohorts
Source: PLOS journal article supplement (doi:10.1371/journal.pone.0164688), 2016-10-12

### ACC/AHA risk score

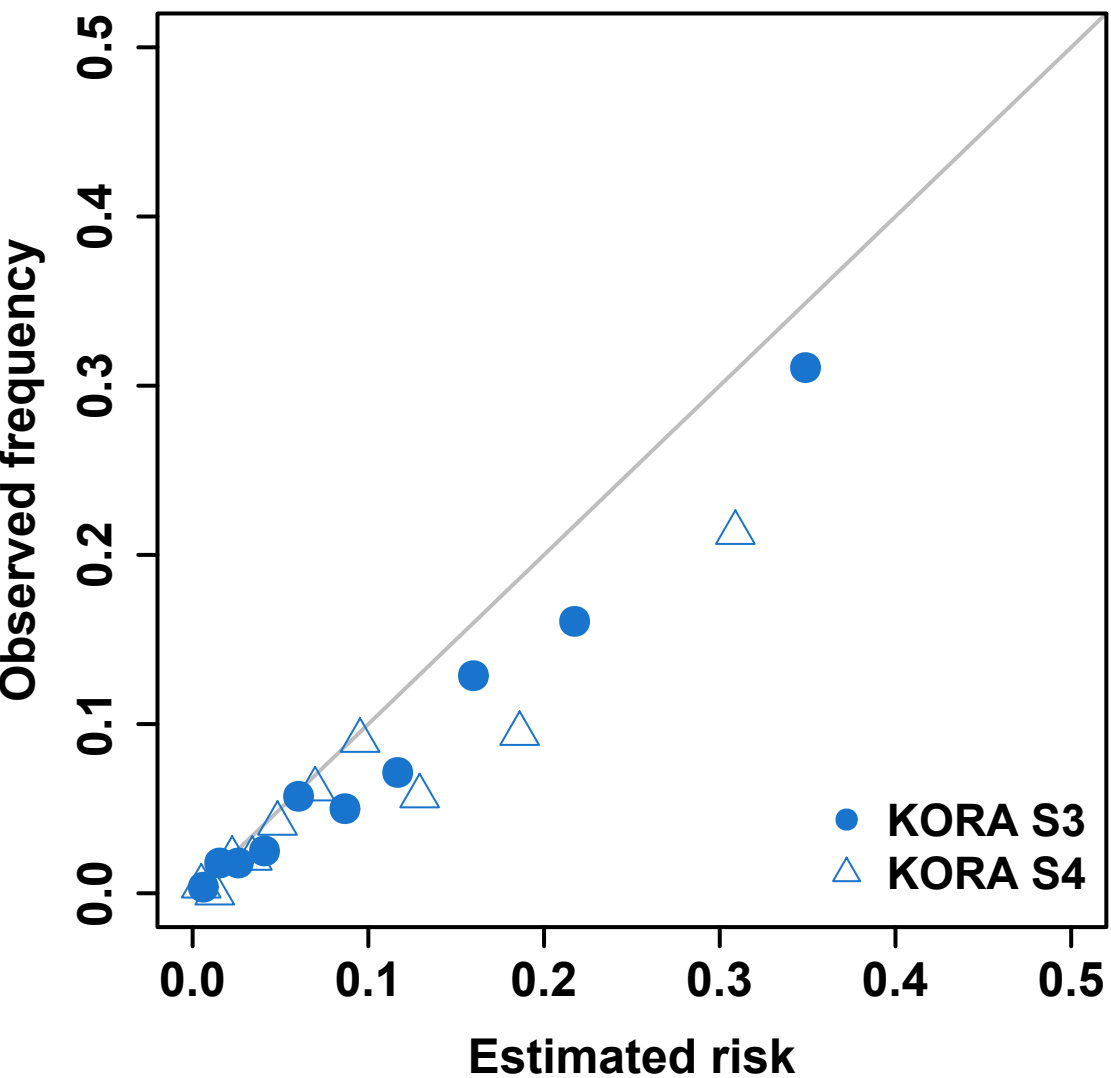

### Recalibrated ACC/AHA risk score

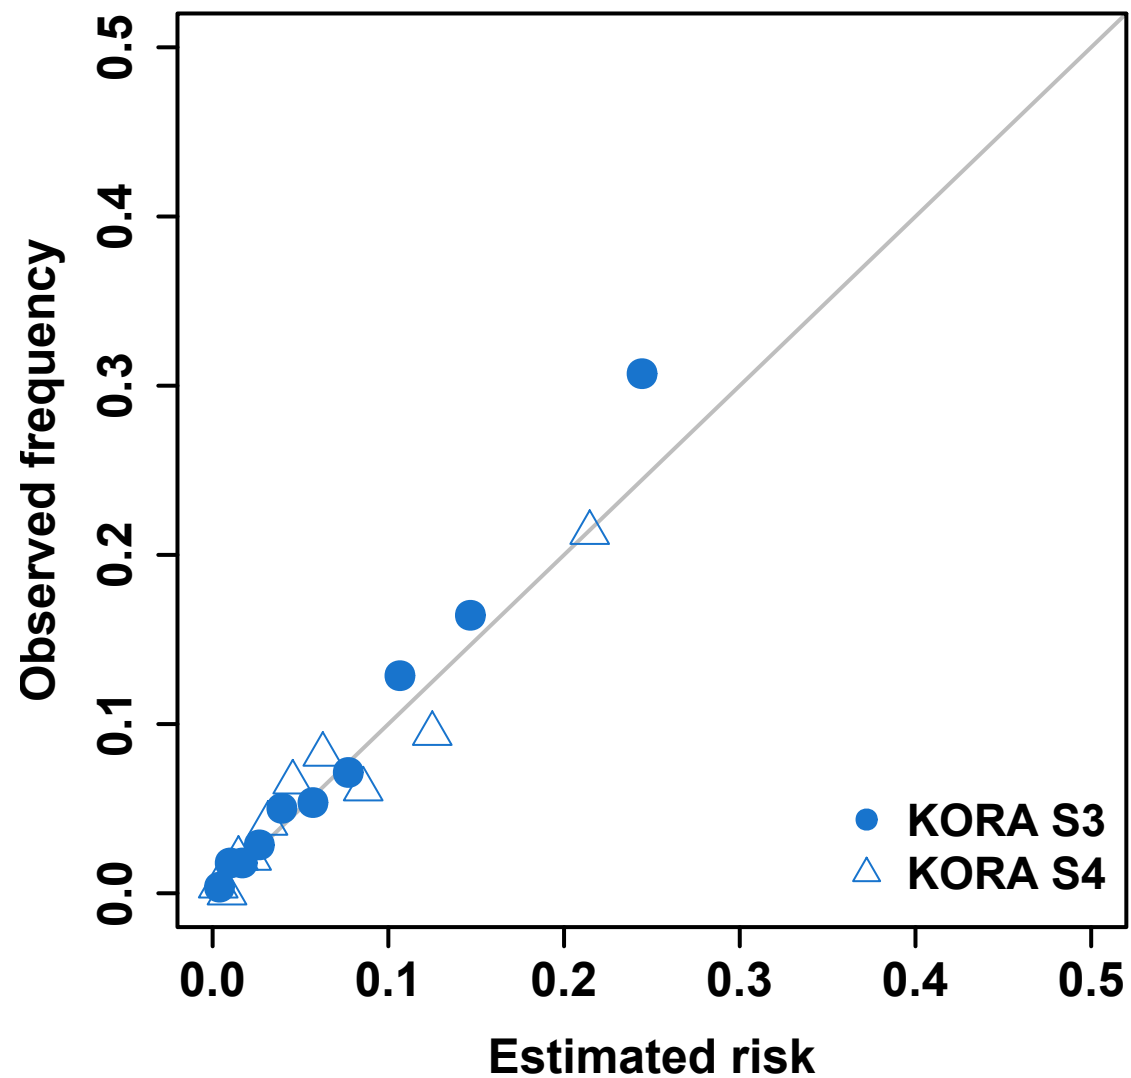

Supplement: S3 (10.1371/journal.pone.0164688.s003) [file journal.pone.0164688.s003.PDF › journal.pone.0164688.s003.PDF]
