# Supplementary material for: Recalibration of the ACC/AHA Risk Score in Two Population-Based German Cohorts
Source: PLOS journal article supplement (doi:10.1371/journal.pone.0164688), 2016-10-12
Supplement: S4 (10.1371/journal.pone.0164688.s004) [file journal.pone.0164688.s004.PDF › journal.pone.0164688.s004.PDF]

***Part A: Originally published coefficients of ACC/AHA risk score for Caucasian race***  
(Goff et al. 2014)

|                               | <b>Women</b> | <b>Men</b> |
|-------------------------------|--------------|------------|
| Ln Age (years)                | -29.799      | 12.344     |
| Ln Age (years), Squared       | 4.884        | 0          |
| Ln Total Cholesterol (mg/dL)  | 13.54        | 11.853     |
| Ln HDL Cholesterol (mg/dL)    | -13.578      | -7.99      |
| Current Smoker (1=yes, 0=no)  | 7.574        | 7.837      |
| Diabetes (1=yes, 0=no)        | 0.661        | 0.658      |
| Ln Age x Ln Total Cholesterol | -3.114       | -2.664     |
| Ln Age x Ln HDL Cholesterol   | 3.149        | 1.769      |
| Ln Untreated SBP (mm Hg)      | 1.957        | 1.764      |
| Ln Treated SBP (mm Hg)        | 2.019        | 1.797      |
| Ln Age x Current Smoker       | -1.665       | -1.795     |
| Population mean               | -29.18       | 61.18      |
| Baseline Survival at 10 years | 0.9665       | 0.9144     |

Ln = natural logarithm, HDL = High-density lipoprotein, SBP = Systolic blood pressure.

***Part B: Calculation of ASCVD 10 year risk for German population with and without recalibration of ACC/AHA risk score***

- ASCVD risk by original ACC/AHA risk equations:

$$10 \text{ year risk of ASCVD} = 1 - \text{Baseline Survival at 10 years}^{\exp(\text{Risk score} - \text{Population mean})}$$

- ASCVD risk using the recalibrated ACC/AHA risk equations:

$$\text{correction factor} = \ln \left( \frac{\frac{\text{observed event frequency}}{1 - \text{observed event frequency}}}{\frac{\text{mean predicted risk}}{1 - \text{mean predicted risk}}} \right) = \ln \left( \frac{\frac{0.06923566}{0.93076434}}{\frac{0.1030771}{0.8969229}} \right) = -0.434997$$

$$10 \text{ year risk of ASCVD} = 1 - \text{Baseline Survival at 10 years}^{\exp(\text{Risk score} - \text{Population mean} - 0.434997)}$$
